# Supplementary material
Source: MDPI journal article supplement (https://www.mdpi.com/2073-4395/13/2/384)
Supplement: s1 [file s1]

**Table S1. The primer sequence**

| Primer Comments                  | Primer sequence        |
|----------------------------------|------------------------|
| <i>GmVIT1</i> cloning            | F: ATGGCATCAGATCACTCG  |
|                                  | R: CTAAAGACCACTTGACCCA |
| qRT-PCR of <i>GmVIT1</i>         | F: GCATCAGATCACTCGTCCG |
|                                  | R: AACCCGTCATTGGCACCTA |
| GmVIT1 promoter fragment cloning | F: TATCTGAGTCATGCCATAC |
|                                  | R: GAAAAAAGGGTGAACG    |
| <i>GmActin</i>                   | F: ACGAGCGTTTCAGATG    |
|                                  | R: ACCTCCGATCCAGACA    |
